# Supplementary material for: Label-Free Detection of DNA via Surface-Enhanced Raman Spectroscopy Using Au@Ag Nanoparticles
Source: MDPI journal article supplement (doi:10.3390/nano12183119), 2022-09-08
Supplement: s1 [file s1]

# Label-Free Detection of DNA via Surface-Enhanced Raman Spectroscopy Using Au@Ag Nanoparticles

Ting Zhang <sup>1,†</sup>, Xubin Quan <sup>1,†</sup>, Naisi Cao <sup>1</sup>, Zhaoying Zhang <sup>2,\*</sup> and Yang Li <sup>1,\*</sup>

<sup>1</sup> Department of Pharmaceutical Analysis and Analytical Chemistry, Research Center for Innovative Technology of Pharmaceutical Analysis, College of Pharmacy, Harbin Medical University, Harbin 150081, China  
<sup>2</sup> The Fourth Hospital of Harbin Medical University, Harbin 150001, China  
\* Correspondence: zhzh\_405@163.com (Z.Z.); liy@hrbmu.edu.cn (Y.L.).  
† These authors contributed equally to this work.

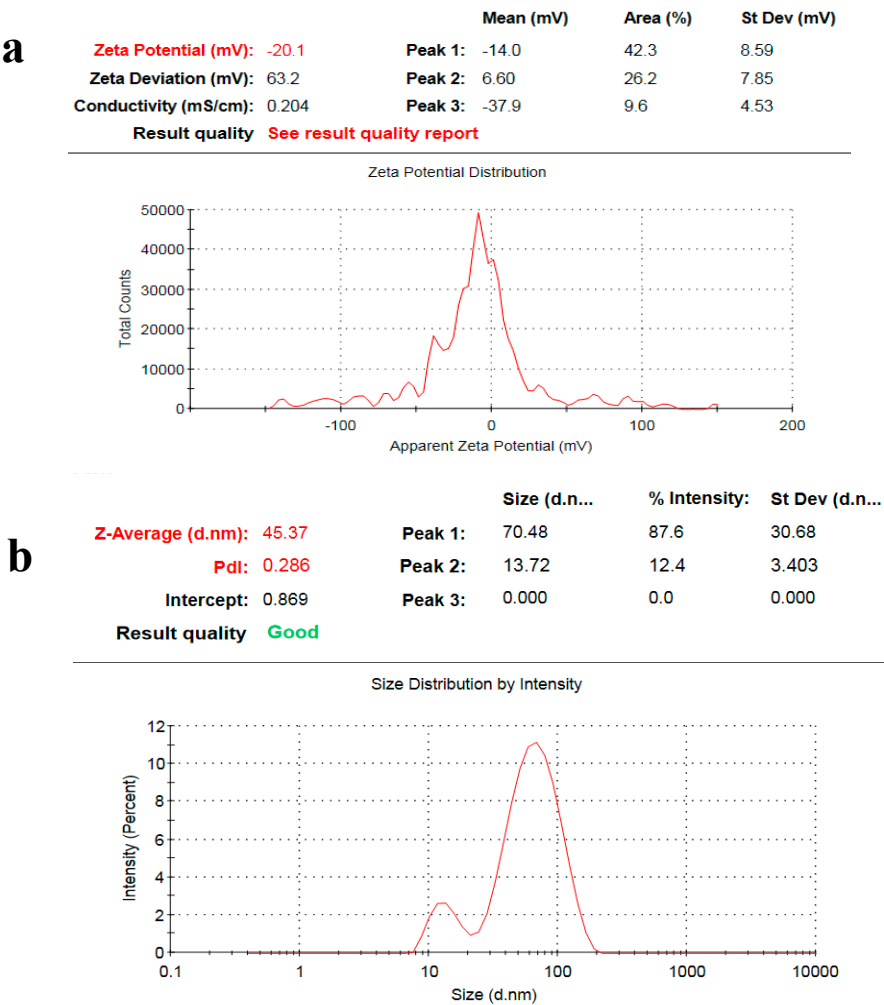

Figure S1. (a)The Zeta potential of Au@AgNPs; (b) The DLS data of Au@AgNPs.

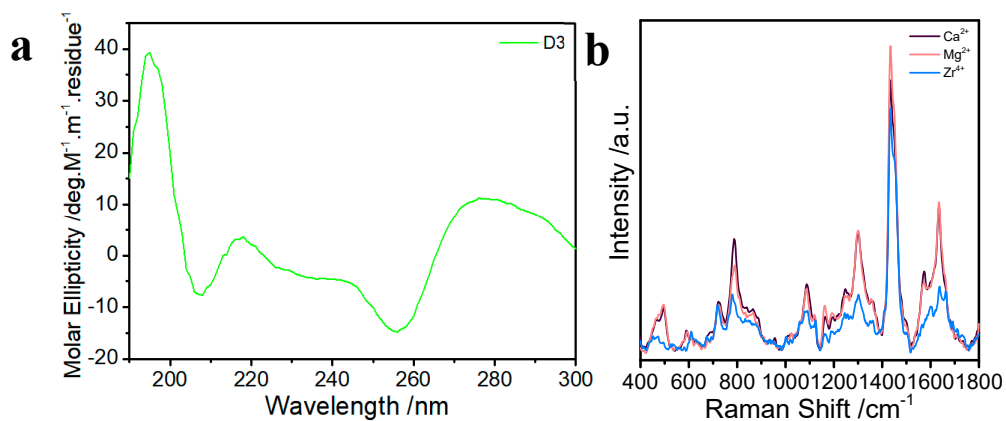

**Figure S2.** (a) CD spectra of the D3; (b) The D3 SERS spectrum of Au@AgICNPs (Brown line), Au@AgIMNPs (red line) and Au@AgIZNPs (blue line).

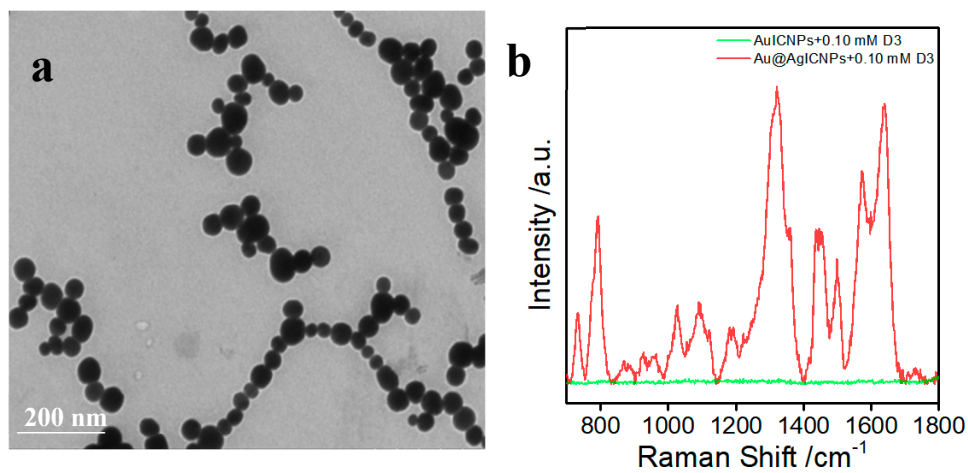

**Figure S3.** (a) The TEM of pure AuNPs; (b) The D3 SERS spectrum of AuICNPs with 0.1 mM D3 (green line) and Au@AgICNPs with 0.1 mM D3 (red line).

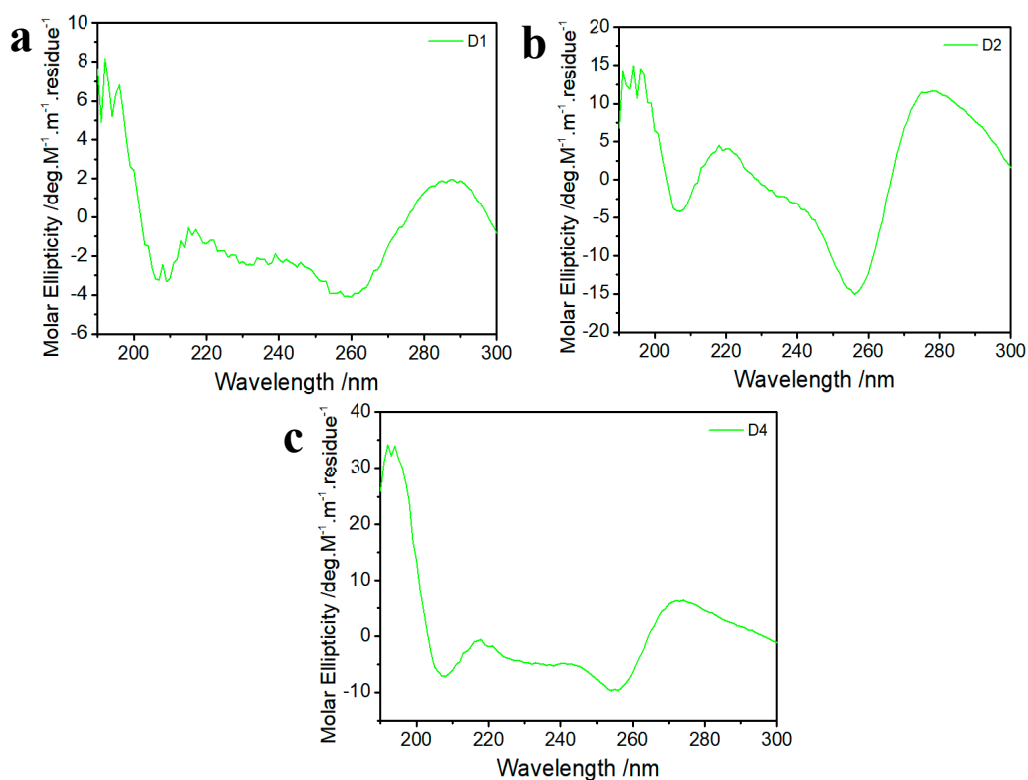

**Figure S4.** (a) The CD spectra of the D1; (b) The CD spectra of the D2; (c) The CD spectra of the D4.

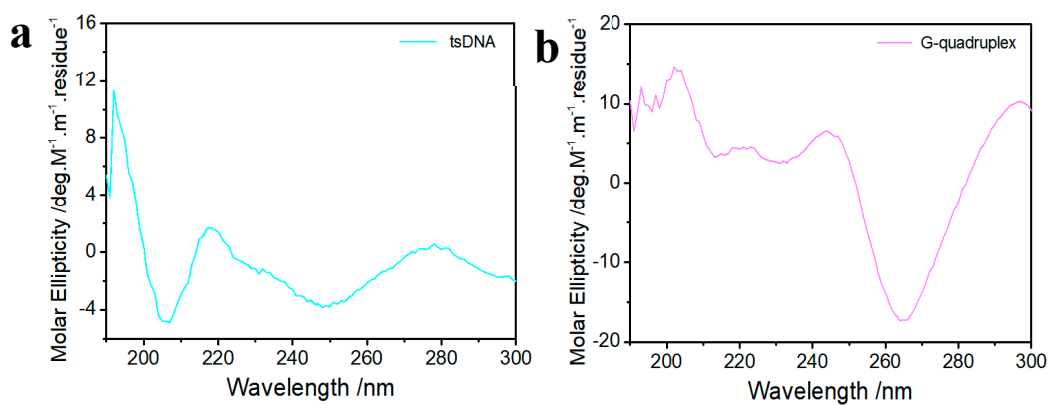

**Figure S5.** (a) The CD spectra of the tsDNA; (b) The CD spectra of the G-quadruplex.

**Table S1.** The characteristic peak positions of DNA of different structures.

| Raman Shift           |                       | dsDNA                                | tsDNA                                |
|-----------------------|-----------------------|--------------------------------------|--------------------------------------|
| 733 cm <sup>-1</sup>  | 736 cm <sup>-1</sup>  | dA ring br                           | dA ring br                           |
| 789 cm <sup>-1</sup>  | 795 cm <sup>-1</sup>  | vs OPO; dC ring br                   | vs OPO; dT ring br                   |
| 868 cm <sup>-1</sup>  | -                     | v OPO, bk                            | -                                    |
| 962 cm <sup>-1</sup>  | -                     | d, dG δ R5                           | -                                    |
| 1028 cm <sup>-1</sup> | 1033 cm <sup>-1</sup> | d (v C-O)                            | d (v C-O)                            |
| 1093 cm <sup>-1</sup> | 1094 cm <sup>-1</sup> | vs PO <sub>2</sub> <sup>-</sup> , bk | vs PO <sub>2</sub> <sup>-</sup> , bk |
| 1323 cm <sup>-1</sup> | 1322 cm <sup>-1</sup> | dG v(C-N) δ(C8-H)                    | dG v(C-N) δ(C8-H)                    |
| 1360 cm <sup>-1</sup> | -                     | dG C2'-endo/ <i>syn</i>              | -                                    |
| 1637 cm <sup>-1</sup> | 1632 cm <sup>-1</sup> | dT, dC v C5=C6                       | dT v C5=C6                           |

  

| Raman Shift           |                       | dsDNA                                | G-quadruplex                         |
|-----------------------|-----------------------|--------------------------------------|--------------------------------------|
| 733 cm <sup>-1</sup>  | 713 cm <sup>-1</sup>  | dA ring br                           | dA ring br                           |
| 789 cm <sup>-1</sup>  | 789 cm <sup>-1</sup>  | vs OPO; dC ring br                   | vs OPO; dT ring br                   |
| 868 cm <sup>-1</sup>  | -                     | v OPO, bk                            | -                                    |
| 962 cm <sup>-1</sup>  | -                     | d, dG δ R5                           | -                                    |
| 1028 cm <sup>-1</sup> | -                     | d (v C-O)                            | -                                    |
| 1093 cm <sup>-1</sup> | 1087 cm <sup>-1</sup> | vs PO <sub>2</sub> <sup>-</sup> , bk | vs PO <sub>2</sub> <sup>-</sup> , bk |
| -                     | 1241 cm <sup>-1</sup> | -                                    | dT, dG δ NH(N2)                      |
| 1323 cm <sup>-1</sup> | -                     | dG v(C-N) δ(C8-H)                    | -                                    |
| 1360 cm <sup>-1</sup> | 1358 cm <sup>-1</sup> | dG C2'-endo/ <i>syn</i>              | dG v(C-N) δ(C8-H) C2'-               |
| 1637 cm <sup>-1</sup> | 1644 cm <sup>-1</sup> | dT, dC v C5=C6                       | endo/ <i>anti</i>                    |
| -                     | 1764 cm <sup>-1</sup> | -                                    | dT v C5=C6                           |
|                       |                       |                                      | dG v C=O (O6 interbase H-bond)       |

Note: bk=DNA - phosphate backbone, d =deoxyribose, v=stretch, δ=deformation, br =breathe, s =symmetry.

**Table S2.** The motifs of tsDNA and G-quadruplex detected in the paper.

|              |                                                          |
|--------------|----------------------------------------------------------|
| tsDNA        | 5'-AGA <sub>7</sub> GGA-3'<br>5'-TCT <sub>7</sub> CCT-3' |
| G-quadruplex | 5'-G <sub>4</sub> T <sub>4</sub> G <sub>4</sub> -3'      |
